# Supplementary material
Source: Springer Nature journal article supplement (https://www.springermedizin.de/resource/supplementary/12882_2011_312_MOESM1_ESM.pdf/9453570)

A)

Kidney biopsy

Kidney biopsy

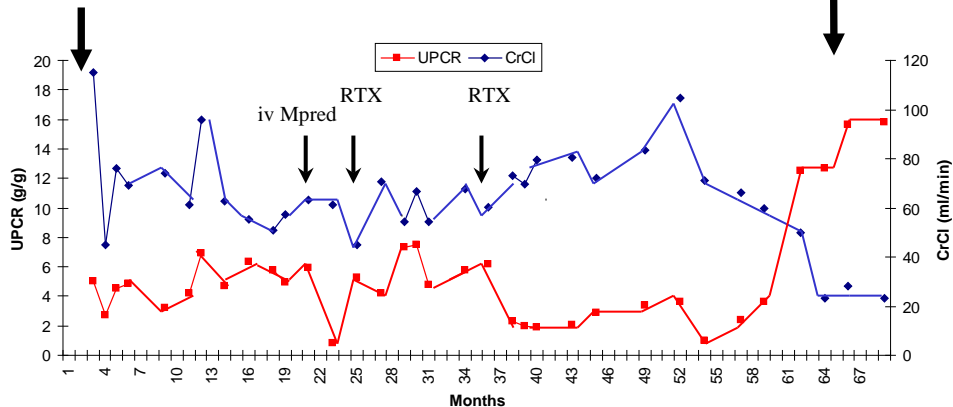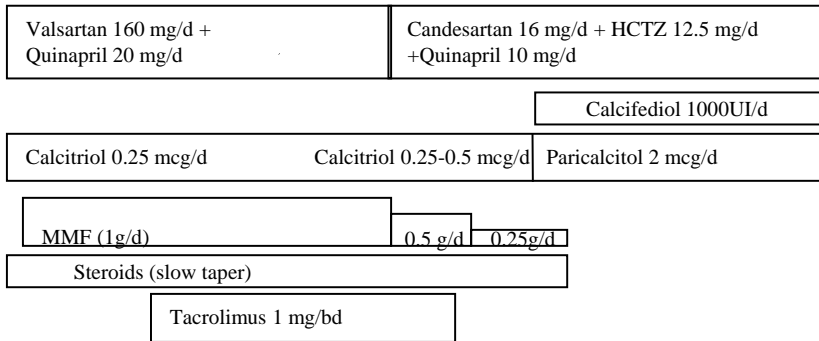

B) PAS staining

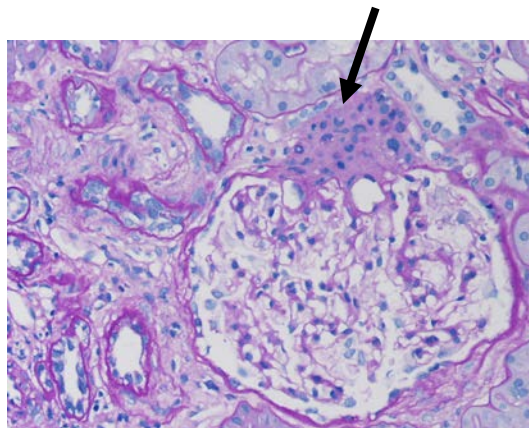

C) Renin immunohistochemistry

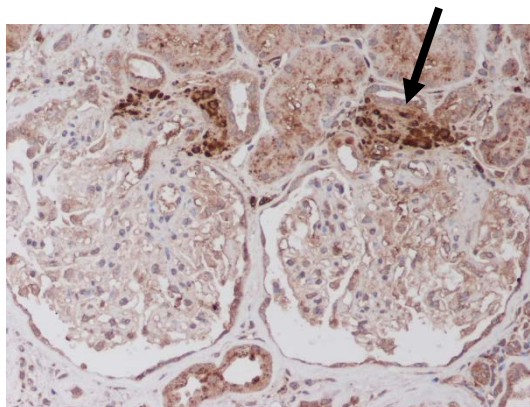

Supplement: MOESM1 [file 9453570]
